# Supplementary material for: An amorphous zinc/copper double transition metal hydroxides for electrochemical simultaneous detection of dopamine, serotonin, and melatonin
Source: Royal Society of Chemistry journal article supplement (doi:10.1039/d3nj02297h), 2023-01-01
Supplement: d3nj02297h1.pdf [file d3nj02297h1.pdf]

## **Electronic Supplementary Material (ESM)**

### **An amorphous zinc/copper double transition metal hydroxides for electrochemical simultaneous detection of dopamine, serotonin and melatonin**

Shanshan Tang, Miao Liu, Wei Wang, Axin Liang, Fulai Zhang,  
Aiqin Luo\*

Key Laboratory of Molecular Medicine and Biotherapy, School of  
Life Science, Beijing Institute of Technology, Beijing 100081,  
China

\* Corresponding Author Phone: +86 010 68915996

E-mail: aqluobit@163.com (A. Luo)

### S1. Optimization of detection conditions

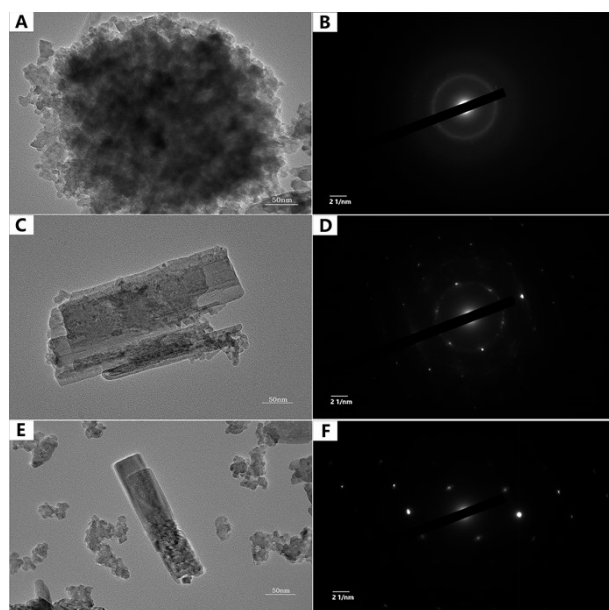

Fig. S1 TEM images and SAED patterns of ZnCu bimetallic hydroxides synthesized with different contents of Zn and Cu elements: 1:1(A, B), 1:2(C, D), 2:1(E, F).
